# Supplementary material for: Anti-counterfeiting fiber system with near-infrared wavelength selectivity based on photothermal and thermochromic dyes
Source: Royal Society of Chemistry journal article supplement (doi:10.1039/d3ra06965f), 2024-01-01
Supplement: d3ra06965f1.pdf [file d3ra06965f1.pdf]

## Supplementary Information

# Anti-counterfeiting Fiber System with Near-Infrared Wavelength Selectivity Based on Photothermal and Thermochromic Dyes

Su Jeong Choi<sup>1</sup>‡, Eun Jeong Seo<sup>1</sup>, Hyoung Eun Bae<sup>1</sup>, Hyo Cheol Jung<sup>1</sup>, Sang Ho Lee<sup>1</sup>,  
Jin Chul Kim<sup>1</sup>, Jung Yu Jin<sup>1</sup>, Jong S. Park<sup>2</sup>, Ji-Eun Jeong<sup>1\*</sup>, and Young Il Park<sup>1\*</sup>

*<sup>1</sup>Research Center for Green Fine Chemicals, Korea Research Institute of Chemical  
Technology, Ulsan 44412, Republic of Korea*

*<sup>2</sup>Department of Organic Material Science and Engineering, Pusan National University,  
Busan, 46241, Republic of Korea*

‡ These authors contributed equally to this work

\* Corresponding authors:

Dr. Ji-Eun Jeong ([jieunj@kriict.re.kr](mailto:jieunj@kriict.re.kr)) and Dr. Young Il Park ([ypark@kriict.re.kr](mailto:ypark@kriict.re.kr))

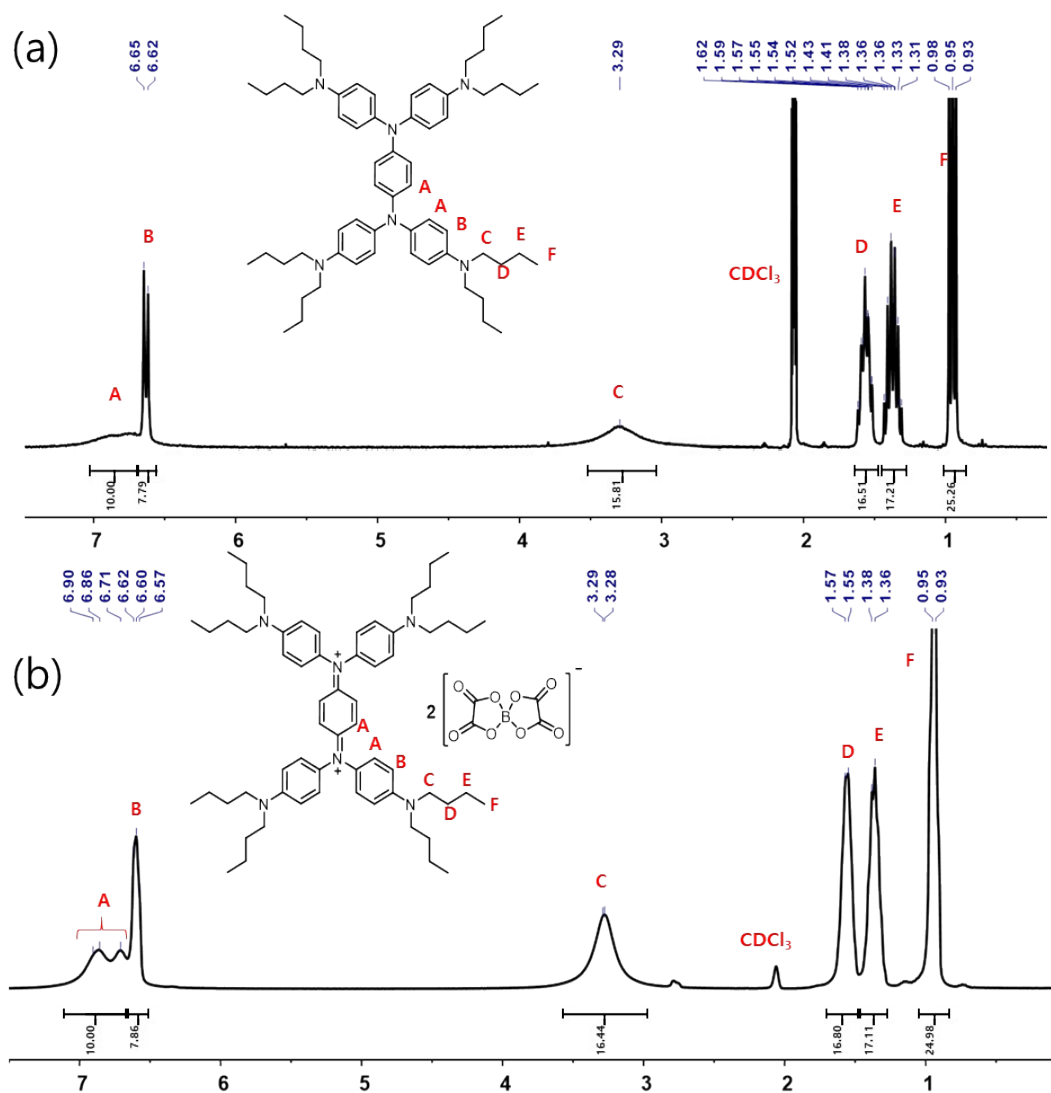

**Figure S1.** (a) Synthetic scheme of Diimmonium salt and H-NMR data of (b) Compound 1 and (c) Compound 2.

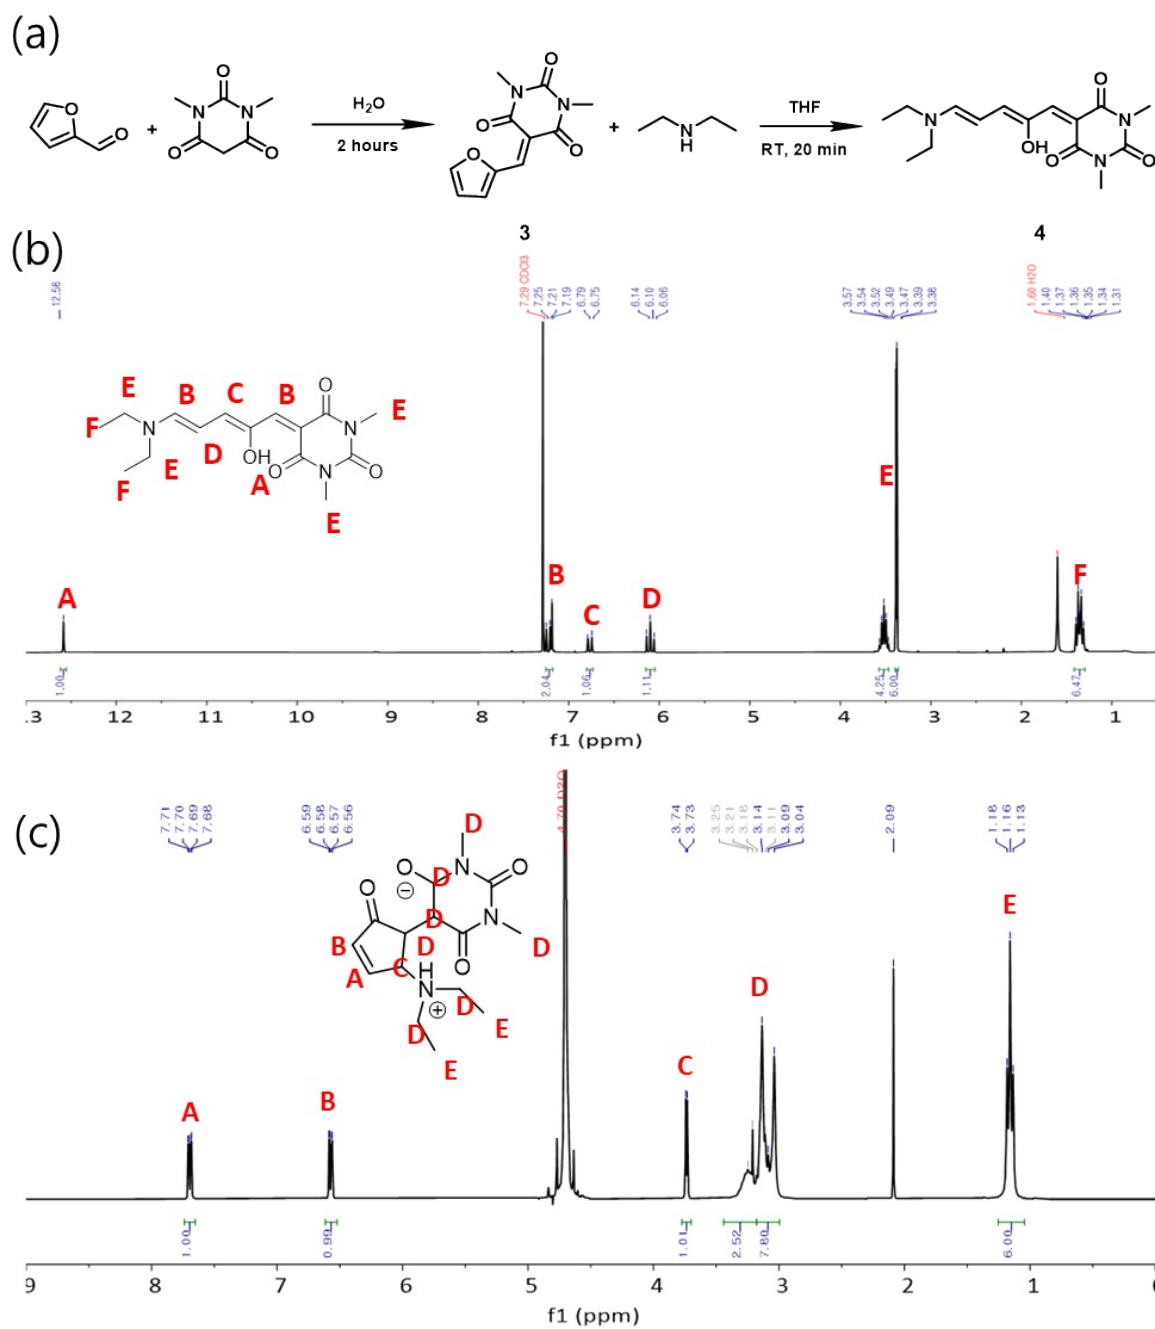

**Figure S2.** Synthetic scheme of donor-acceptor Stenhouse adduct (DASA)

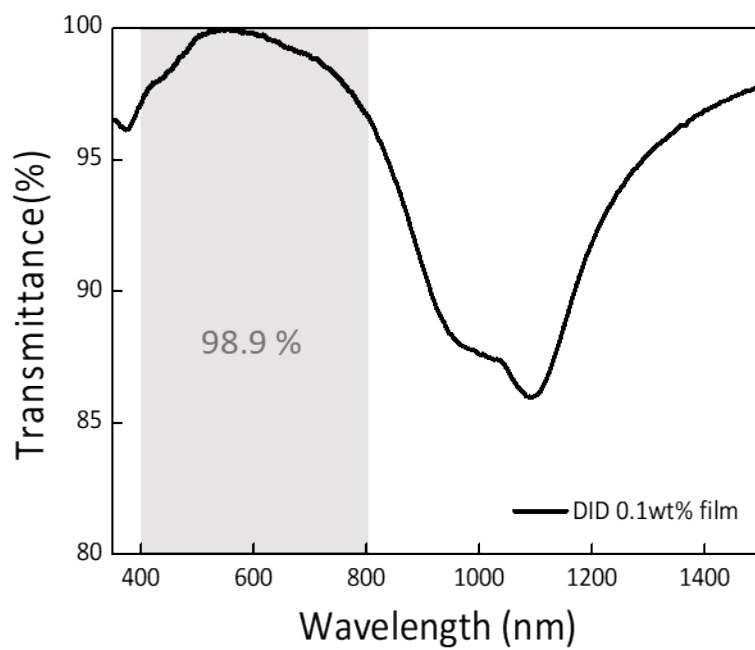

**Figure S3.** Transmittance spectrum of DID film (0.1 wt DID in PMMA).
